# Supplementary material for: Patients with Liver Cirrhosis as Frequent Attenders of Emergency Departments
Source: Hindawi journal article supplement (doi:10.1155/2020/8289275), 2020-02-11
Supplement: f1 [file 8289275.f1.pdf]

Supplement Table 1

Logistic regression analysis of factors associated with presenting as frequent attenders

| <b>Variables</b>                 | <b>Adjusted odds ratio</b> | <b>95% CI</b> | <b>p value</b> |
|----------------------------------|----------------------------|---------------|----------------|
| <b>Age</b>                       | 0.980                      | 0.974-0.987   | < 0.001        |
| <b>Ischemic heart disease</b>    | 1.687                      | 1.315-2.163   | < 0.001        |
| <b>Heart failure</b>             | 1.883                      | 1.381-2.569   | < 0.001        |
| <b>COPD</b>                      | 2.053                      | 1.745-2.416   | < 0.001        |
| <b>Chronic renal disease</b>     | 1.843                      | 1.526-2.226   | < 0.001        |
| <b>Malignancy other than HCC</b> | 1.967                      | 1.604-2.412   | < 0.001        |
| <b>Alcoholic liver cirrhosis</b> | 1.394                      | 1.155-1.682   | < 0.001        |
| <b>Liver cirrhosis Child A</b>   | 0.817                      | 0.676-0.987   | 0.036          |
| <b>Liver cirrhosis Child C</b>   | 1.249                      | 1.036-1.507   | 0.020          |

COPD: chronic obstructive pulmonary disease; HCC: hepatocellular carcinoma; Child A, B, C: Child-Pugh classification A, B, C (Child A: good hepatic function; Child B: intermediate hepatic function; Child C: poor hepatic function)

Hosmer-Lemeshow test for the model: P = 0.160
